# Supplementary material for: Lyophilization protects [FeFe]-hydrogenases against O2-induced H-cluster degradation
Source: PubMed Central journal article supplement (PMC4568494; doi:10.1038/srep13978), 2015-09-14
Supplement: srep13978-s1.pdf [file srep13978-s1.pdf]

1 **Supplementary Information**

2  
3 **Lyophilization protects [FeFe]-hydrogenases against O<sub>2</sub>-induced H-cluster**  
4 **degradation**

5  
6 Jens Noth<sup>1</sup>, Ramona Kositzki<sup>2</sup>, Kathrin Klein<sup>3</sup>, Martin Winkler<sup>1</sup>, Michael Haumann<sup>2</sup> and  
7 Thomas Happe<sup>1\*</sup>

8  
9 <sup>1</sup>Ruhr-Universität Bochum, Fakultät für Biologie und Biotechnologie, Lehrstuhl für  
10 Biochemie der Pflanzen, AG Photobiotechnologie, 44801 Bochum, Germany

11 <sup>2</sup>Freie Universität Berlin, Institut für Experimentalphysik, 14195 Berlin, Germany

12 <sup>3</sup>Ruhr-Universität Bochum, Fakultät für Chemie und Biochemie, Anorganische Chemie I –  
13 Bioanorganische Chemie, 44801 Bochum, Germany

14  
15 *\*Correspondence to:*

16 Prof. Thomas Happe, Ruhr-Universität Bochum, Fakultät für Biologie und Biotechnologie,  
17 Lehrstuhl für Biochemie der Pflanzen, AG Photobiotechnologie, Universitätsstrasse 150,  
18 44801 Bochum, Germany

19 Phone: +49 234 32 27026, Fax: +49 234 32 14322, Email: [thomas.happe@rub.de](mailto:thomas.happe@rub.de)

22 **This file includes:**

23 **Supplementary Table S1: Comparison of HYDA1 protein purification yields**

24 **Supplementary Figure S1: Purification and activity measurements of HIS<sub>6</sub>- and STII-tagged**  
25 **HYDA1 and CPI**

26 **Supplementary References**

27

28

29

30 **Supplementary Table S1. Comparison of HYDA1 protein purification yields.<sup>a</sup>**

| Expression host          | Cluster occupation                        | Purification tag | Yield [mg L <sup>-1</sup> ] | Spec. activity [ $\mu\text{mol H}_2 \cdot \text{mg}^{-1} \cdot \text{min}^{-1}$ ] | Reference                 |
|--------------------------|-------------------------------------------|------------------|-----------------------------|-----------------------------------------------------------------------------------|---------------------------|
| <i>C. reinhardtii</i>    | [4FeH] + [2FeH]                           | w/o              | $3.2 \cdot 10^{-4}$         | 360                                                                               | Roessler and Lien, 1984   |
| <i>C. reinhardtii</i>    | [4FeH] + [2FeH]                           | w/o              | 0.07                        | 935                                                                               | Happe and Naber, 1993     |
| <i>E. coli</i>           | [4FeH] + [2FeH]                           | STII             | 0.9                         | 150                                                                               | King et al, 2006          |
| <i>S. oneidensis</i>     | [4FeH] + [2FeH]                           | STII             | 0.45                        | 700                                                                               | Sybirna et al, 2008       |
| <i>C. acetobutylicum</i> | [4FeH] + [2FeH]                           | STII             | 1.0                         | 625                                                                               | v. Abendroth et al, 2008  |
| <i>E. coli</i>           | [4FeH] + [2FeH]                           | STII             | 30                          | 641                                                                               | Kuchenreuther et al, 2010 |
| <i>E. coli</i>           | [4FeH] + [2FeH]                           | HIS <sub>6</sub> | 45                          | 660                                                                               | This work                 |
| <i>E. coli</i>           | [4FeH]<br>[4FeH] + [2FeH <sub>act</sub> ] | HIS <sub>6</sub> | 90                          | 0<br>950                                                                          | This work                 |

31

32 <sup>a</sup>Specific activities in the present work were determined using the sodium-dithionite-driven hydrogen-  
33 production-assay with methyl viologen as an artificial electron mediator. Activities in ref.<sup>1</sup> were  
34 determined using 10  $\mu\text{M}$  of ferredoxin for electron shuttling instead and the total reported yield had a  
35 purity of approximately 40%. HYDA1[4FeH] was *in vitro* matured with 2Fe<sub>act</sub> prior to activity  
36 determination<sup>2</sup>.

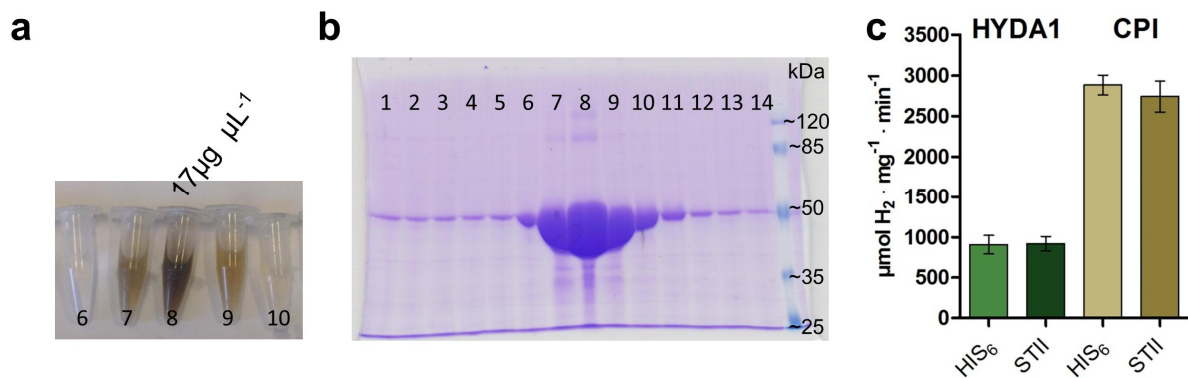

37

38 **Supplementary Figure S1. Purification and activity measurements of HIS<sub>6</sub>- and STII-tagged**  
 39 **HYDA1 and CPI.** A Ni-NTA gravity-flow column with a volume of 4 mL was used to purify 45 mg of  
 40 HYDA1[4FeH]-HIS<sub>6</sub> from 0.5 L of *E. coli* culture. (A) Photograph of the main [FeFe]-hydrogenase  
 41 elution fractions (6-10), the dark-brown fraction 8 with a volume of 1.1 mL has a concentration of  
 42 17  $\mu\text{g protein } \mu\text{L}^{-1}$  (340  $\mu\text{M}$ ). (B) The Coomassie-stained SDS-PAGE (10%) shows one significant  
 43 protein band at a molecular weight of 50 kDa. Each lane (1-14) was loaded with 5  $\mu\text{L}$  of protein eluate.  
 44 (C) Comparison of the specific activities of Strep-tag II (STII) and HIS<sub>6</sub>-tag purified hydrogenase  
 45 proteins HYDA1[4FeH] and CPI[4FeH] were *in vitro* activated with  $2\text{Fe}_{\text{adt}}^2$  prior to the activity assay.  
 46 1  $\mu\text{g}$  HYDA1 or 0.5  $\mu\text{g}$  CPI was used in the activity assays, each data point represents the mean of 3  
 47 measurements, error bars give standard deviations.

48

49

50

51

52

53

54

55

56 **Supplementary references**

- 57 1. Roessler, P. G. & Lien, S. Purification of hydrogenase from *Chlamydomonas reinhardtii*.  
58 *Plant Physiol.* **75**, 705-709 (1984).
- 59 2. Esselborn, J., *et al.* Spontaneous activation of [FeFe]-hydrogenases by an inorganic [2Fe]  
60 active site mimic. *Nat. Chem. Biol.* **9**, 607-609 (2013).
- 61 3. Happe, T. & Naber, J. D. Isolation, characterization and N-terminal amino acid sequence of  
62 hydrogenase from the green alga *Chlamydomonas reinhardtii*. *Eur. J. Biochem.* **214**, 475-481  
63 (1993).
- 64 4. King, P. W., Posewitz, M. C., Ghirardi, M. L. & Seibert, M. Functional studies of [FeFe]  
65 hydrogenase maturation in an *Escherichia coli* biosynthetic system. *J. Bacteriol.* **188**, 2163-  
66 2172 (2006).
- 67 5. Sybirna, K., *et al.* *Shewanella oneidensis*: a new and efficient system for expression and  
68 maturation of heterologous [Fe-Fe] hydrogenase from *Chlamydomonas reinhardtii*. *BMC*  
69 *Biotechnol.* **8**, 73 (2008).
- 70 6. von Abendroth, G., *et al.* Optimized over-expression of [FeFe] hydrogenases with high  
71 specific activity in *Clostridium acetobutylicum*. *Int. J. Hydrogen Energ.* **33**, 6076-6081  
72 (2008).
- 73 7. Kuchenreuther, J. M., *et al.* High-yield expression of heterologous [FeFe] hydrogenases in  
74 *Escherichia coli*. *PloS One* **5**, e15491 (2010).

75

76

77
